# Supplementary material for: Integrating hydroxyapatite and bovine bone mineral into cellulose–collagen matrices for enhanced osteogenesis
Source: Royal Society of Chemistry journal article supplement (doi:10.1039/d4ma00456f), 2024-01-01
Supplement: d4ma00456f1.pdf [file d4ma00456f1.pdf]

## Supplementary Information

### Integrating hydroxyapatite and bovine bone mineral into cellulose-collagen matrices for enhanced osteogenesis

Tudor Pinteala,<sup>a,b</sup> Paul-Dan Sirbu,<sup>a,b</sup> Narcis Anghel,<sup>\*c</sup> Irina Rosca,<sup>c</sup> Geanina Voicu,<sup>d</sup> Manuela Calin<sup>d</sup> and Iuliana Spiridon<sup>c</sup>

<sup>a</sup>Department of Orthopedics and Traumatology, Faculty of Medicine, "Grigore T. Popa" University of Medicine and Pharmacy, 700115 Iasi, Romania

<sup>b</sup>Department Orthopedics and Traumatology, Clinical Rehabilitation Hospital, 700661 Iasi, Romania

<sup>c</sup>"Petru Poni" Institute of Macromolecular Chemistry, Grigore Ghica-Vodă 41, 700487, Iași, România; E-mail: anghel.narcis@icmpp.ro

<sup>d</sup>"Medical and Pharmaceutical Bionanotechnologies" Laboratory, Institute of Cellular Biology and Pathology "Nicolae Simionescu" of the Romanian Academy, B.P. Hasdeu 8, 050568 Bucharest, Romania

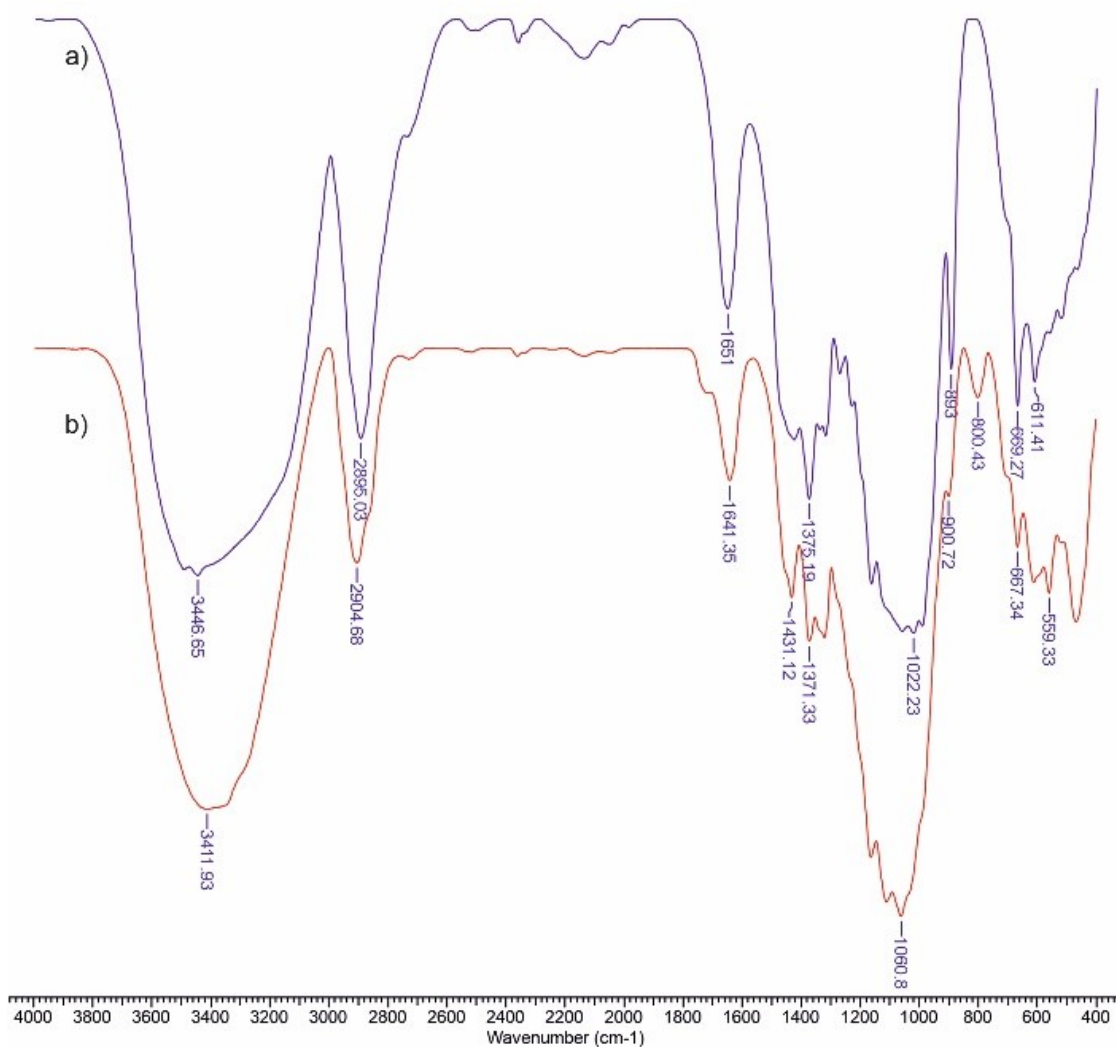

**Figure S1.** FTIR spectra of cellulose (a) and aminomethylphenilboronic cellulose (b).

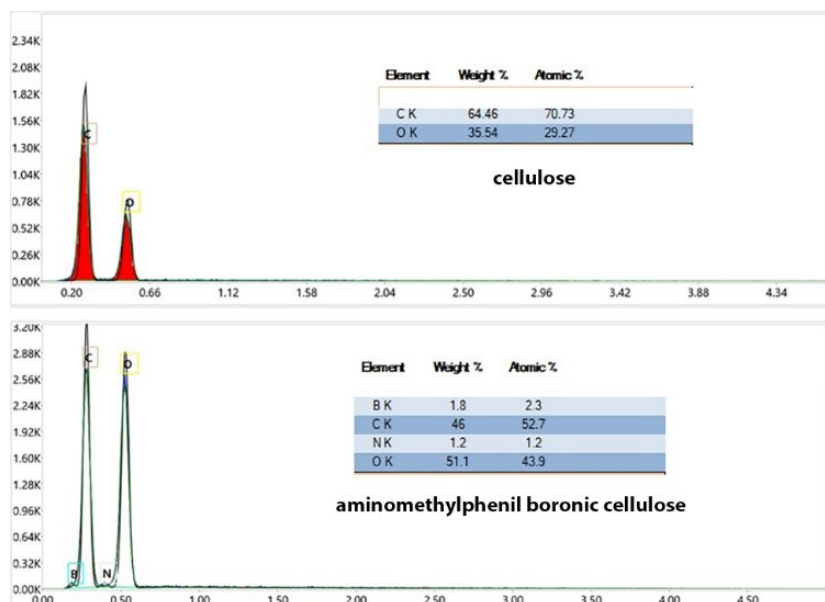

**Figure S2.**EDX spectra of cellulose and its derivative.

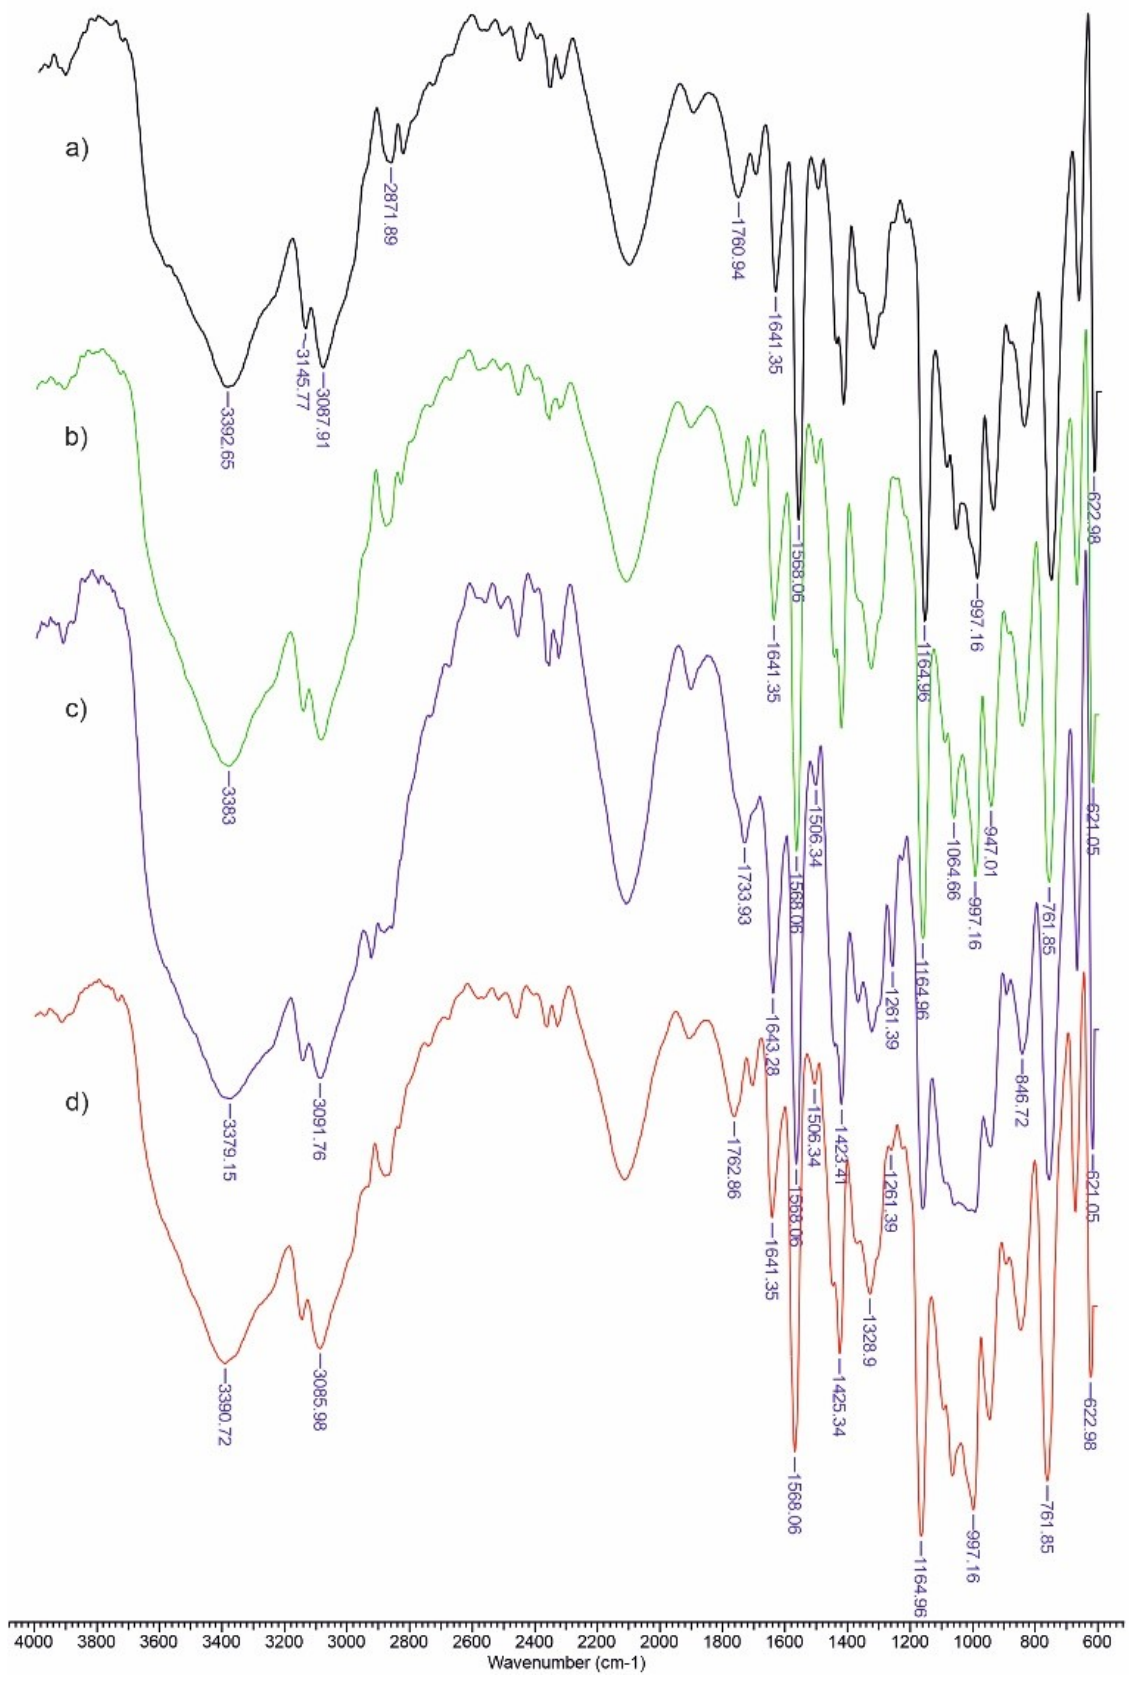

**Figure S3.** FTIR spectra of the obtained biomaterials: a) Cell-Coll-HA; b) CellID-Coll-HA; c) Cell-Coll-InterOss®; d) CellID-Coll-InterOss®.

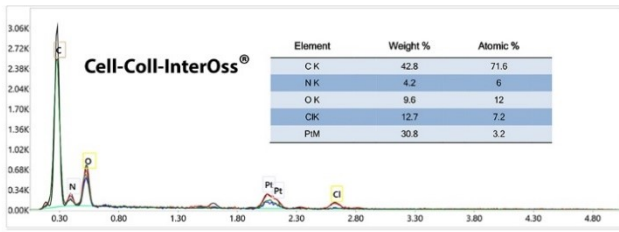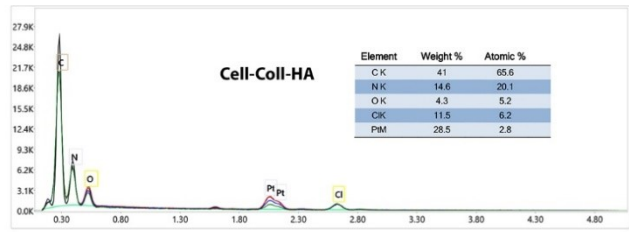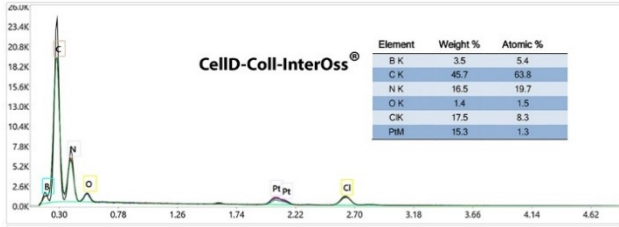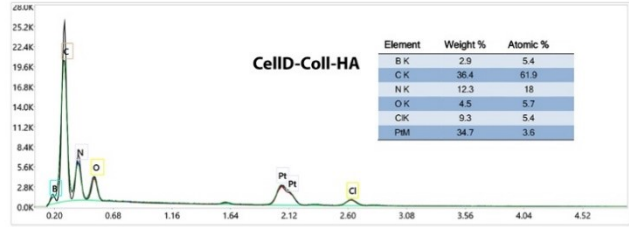

Figure S4. EDX spectra of biomaterials.
